# Supplementary material for: Perioperative Care in Colorectal Cancer Surgery before a Structured Implementation Program of the ERAS Protocol in a Regional Network. The Piemonte EASY-NET Project
Source: MDPI journal article supplement (doi:10.3390/healthcare10010072), 2021-12-31
Supplement: s1 [file s1]

## Supplemental materials –

**Table S1.** Description of indicators of ERAS items compliance by phase of care.

| Indicators                               | Rationale of the item                                                                                                                     | Definition of compliance to the specific item                                              |
|------------------------------------------|-------------------------------------------------------------------------------------------------------------------------------------------|--------------------------------------------------------------------------------------------|
| <i>Preoperative</i>                      |                                                                                                                                           |                                                                                            |
| Anesthesiological visit time             | To assure enough time for preoperative optimization                                                                                       | Visit performed at least 14 days before surgery                                            |
| Counselling                              | Patients should receive dedicated preoperative counselling routinely                                                                      | Counselling provided                                                                       |
| Nutritional risk assessment              | Preoperative routine nutritional assessment offers the opportunity to correct malnutrition and should be offered                          | Nutritional risk assessed with MUST score or during a nutritional visit                    |
| Anemia correction                        | Screening and treatment of iron deficiency anaemia before surgery                                                                         | Correction of iron deficiency anemia for patients with hemoglobin value $\leq 12$ g/dl     |
| No mechanical bowel preparation (colon)  | Mechanical bowel preparation has no clear clinical advantage in colonic surgery and should not be used routinely.                         | Avoid mechanical bowel preparation for colonic surgery                                     |
| No premedication                         | To avoid use of long-acting sedative medication before surgery                                                                            | Avoid long-acting sedative medications is required for compliance to the item              |
| Thromboprophylaxis                       | Prophylaxis for DVT according to local guidelines                                                                                         | Prophylaxis with either heparin or stockings                                               |
| Antibiotics prophylaxis                  | Antibiotics prophylaxis according to local guidelines                                                                                     | Antibiotic prophylaxis prolonged for less than 24 hours                                    |
| No prolonged fasting                     | Patients should be allowed to eat up until 6 hours before initiation of anaesthesia                                                       | Last food intake between 6 and 18 hours before surgery                                     |
| Carbohydrate loading                     | Maltodextrins drinks reduce hunger, thirst, anxiety, postoperative resistance to insulin and to help maintain anabolic state              | Maltodextrins administered before surgery                                                  |
| <i>Intraoperative</i>                    |                                                                                                                                           |                                                                                            |
| Minimally invasive (MIS) surgery         | Minimally invasive approach for colorectal surgery has better short term postoperative outcomes and reduced postoperative stress response | Laparotomic approach or conversion from MIS to open surgery is considered as not compliant |
| No surgical drainage (colon)             | Peritoneal drains show no effect on clinical outcome and should not be used routinely                                                     | The use of abdominal drain in colonic surgery is assessed as a not compliant               |
| Epidural anaesthesia in laparotomic      | The epidural analgesia in laparotomic approach is the best technique for ensuring an opioid sparing analgesia                             | Epidural analgesia in laparotomic approach                                                 |
| Prevention of hypothermia                | Reliable temperature monitoring and methods to actively warm patients should be employed                                                  | Both maintenance of normothermia and prewarming are required for compliance to the item    |
| Fluid normovolemia                       | Perioperative near-zero fluid balance is the target of the gold directed fluid therapy                                                    | Total fluid volume $\leq 4$ ml/Kg/h during surgery                                         |
| PONV prevention                          | A multimodal approach to PONV prophylaxis should be considered                                                                            | PONV prophylaxis provided                                                                  |
| <i>Postoperative items and Follow up</i> |                                                                                                                                           |                                                                                            |

| Indicators                     | Rationale of the item                                                                                                   | Definition of compliance to the specific item                                     |
|--------------------------------|-------------------------------------------------------------------------------------------------------------------------|-----------------------------------------------------------------------------------|
| Fluid normovolemia             | Net “near-zero” fluid and electrolyte balance should be maintained                                                      | Total fluid volume $\leq$ 2ml/Kg/h in postoperative period                        |
| Early removal of i.v.          | Maintain the hydro-electrolytic balance by favoring oral fluid intake                                                   | Removal of i.v. within day 1 after surgery is required for compliance to the item |
| Early rehydration              | Patients should be encouraged to drink when they are awake and free of nausea after the operation                       | Oral diet restarted on the day of surgery                                         |
| Early re-feeding               | Most patients can and should be offered food from the day of surgery                                                    | Re-feeding within day 1 after surgery                                             |
| No nasogastric tubes (NGT)     | Postoperative NGT should not be used routinely                                                                          | Removal of NGT within day 1 after surgery is required for compliance to the item  |
| Early removal of urin catheter | Patients at low risk should have routine removal of catheter on the first day after surgery                             | Removal within day 1 after surgery                                                |
| Early mobilization - day 1     | Prolonged immobilisation is associated with a variety of adverse effects and patients should therefore be mobilised     | At least 2 hours of mobilization the day 1 after surgery                          |
| Minimized opioid use           | Avoid opioids and apply multimodal analgesia in combination with spinal/epidural analgesia or TAP blocks when indicated | Usage of routinary opioids is considered as not compliant                         |
| Early follow-up                | Patient follow-up is integral to an ERAS programme                                                                      | Follow up, also by phone, within 3 days after discharge at home                   |

**Table S2.** Level of adherence (%) to all the ERAS items, by patient demographic and clinical characteristics, by type of centres (No-ERAS and ERAS).

| Variables      |           | No ERAS (N=364) |           |             |         |  | ERAS (N=79) |           |              |         |  |
|----------------|-----------|-----------------|-----------|-------------|---------|--|-------------|-----------|--------------|---------|--|
|                |           | %               | Estimate* | 95%CI       | p value |  | %           | Estimate* | 95%CI        | p value |  |
| Sex            | Female    | 54.8            |           | ref.        |         |  | 83.7        |           | ref.         |         |  |
|                | Male      | 57.0            | -0.41     | -2.55 1.74  | 0.711   |  | 78.3        | -3.25     | -8.49 2.00   | 0.221   |  |
| Age groups     | <65       | 55.6            |           | ref.        |         |  | 80.2        |           | ref.         |         |  |
|                | 65-74     | 54.0            | -2.85     | -5.79 0.09  | 0.058   |  | 80.4        | -0.65     | -7.44 6.13   | 0.849   |  |
|                | $\geq$ 75 | 56.8            | -2.61     | -5.57 0.35  | 0.084   |  | 79.2        | 1.51      | -4.48 7.51   | 0.616   |  |
| Cancer site    | Colon     | 56.2            |           | ref.        |         |  | 81.4        |           | ref.         |         |  |
|                | Rectum    | 54.6            | -3.04     | -5.36 -0.73 | 0.010   |  | 77.3        | -8.89     | -14.14 -3.64 | 0.001   |  |
| Charlson index | =0        | 54.1            |           | ref.        |         |  | 79.8        |           | ref.         |         |  |
|                | $\geq$ 1  | 57.2            | 2.04      | -0.45 4.52  | 0.109   |  | 80.2        | -0.37     | -6.31 5.58   | 0.903   |  |
| ASA score      | 1-2       | 55.6            |           | ref.        |         |  | 79.3        |           | ref.         |         |  |
|                | 3-4       | 55.9            | 0.77      | -1.74 3.27  | 0.548   |  | 80.6        | -0.35     | -6.86 6.17   | 0.916   |  |

\*Estimated by a multilevel regression model adjusted for patient demographic and clinical characteristics and the centres as random effects.
